# Supplementary material for: Discovery of novel PDE9A inhibitors with antioxidant activities for treatment of Alzheimer’s disease
Source: PubMed Central journal article supplement (PMC7011943; doi:10.1080/14756366.2017.1412315), 2017-12-22

# Supporting Information

## Discovery of novel PDE9A inhibitors with antioxidant activity for treatment of Alzheimer's disease

Chen Zhang<sup>a, †</sup>, Qian Zhou<sup>a, †</sup>, Xu-Nian Wu<sup>a</sup>, Ya-Dan Huang<sup>a</sup>, Jie Zhou<sup>a</sup>, Zengwei Lai<sup>a,\*</sup>, Yinuo Wu<sup>a,\*</sup> and Hai-Bin Luo<sup>a, b</sup>

<sup>a</sup> School of Pharmaceutical Sciences, Sun Yat-Sen University, Guangzhou 510006, PR China

<sup>b</sup> Collaborative Innovation Center of High Performance Computing, National University of Defense Technology, Changsha 410073, China

<sup>c</sup> State Key Laboratory for Chemistry and Molecular Engineering of Medicinal Resources, Guangxi Normal University, 15 Yu Cai Road, Guilin 541004, China

† These authors contribute equally.

\*Corresponding authors: wyinuo3@mail.sysu.edu.cn (Y. Wu). or 2860879@sina.com (Z. Lai)

## Content

---

|                                                                                                     |    |
|-----------------------------------------------------------------------------------------------------|----|
| 1. Figure S1-S8 and Table S1 -----                                                                  | S2 |
| 2. <sup>1</sup> HNMR and <sup>13</sup> CNMR of compounds <b>1a-1l</b> , <b>2</b> and <b>3</b> ----- | S9 |

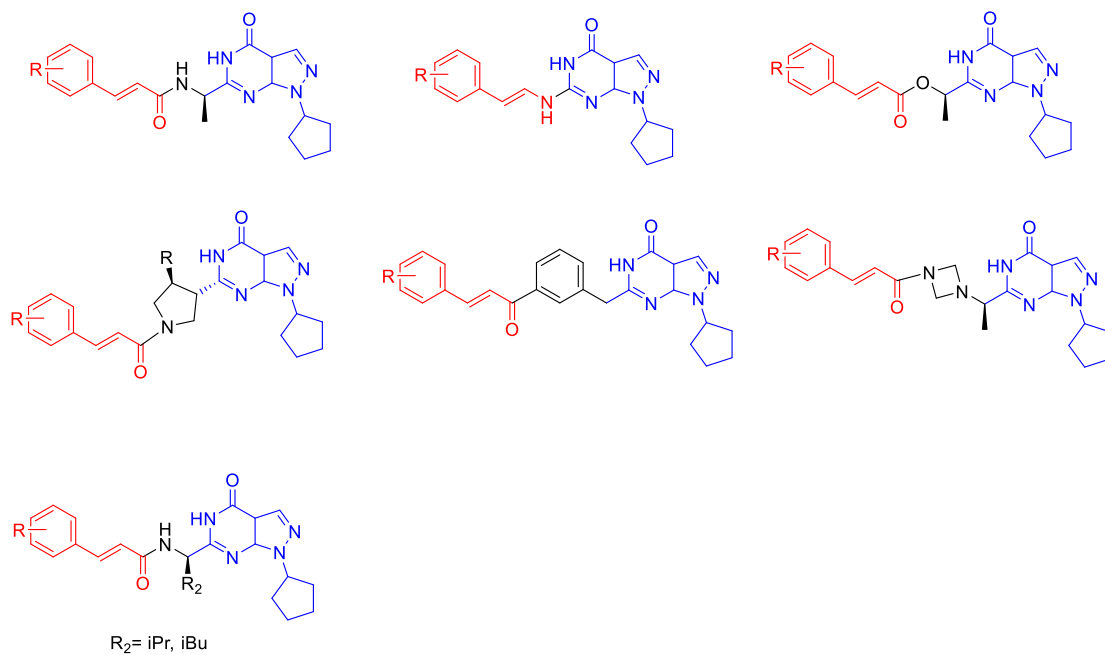

**Figure S1:** Designed compounds with different linkers.

**Table S1.** The Docking Score values and IC<sub>50</sub> of compounds **1a-1l**, **2**, and **3**.

| Compound  | Docking Score <sup>a</sup> | IC <sub>50</sub> ± SD (nM) <sup>b</sup> |
|-----------|----------------------------|-----------------------------------------|
| <b>3</b>  | 3.7284                     | >500 <sup>c</sup>                       |
| <b>1e</b> | 5.6790                     | >200 <sup>c</sup>                       |
| <b>1a</b> | 5.8646                     | 126 ± 15                                |
| <b>1l</b> | 6.2419                     | 57±4                                    |
| <b>1k</b> | 6.3890                     | 130±6                                   |
| <b>1d</b> | 6.7393                     | 83± 11                                  |
| <b>1b</b> | 6.9738                     | 64± 2                                   |
| <b>1j</b> | 7.0099                     | 186±7                                   |
| <b>1h</b> | 7.1075                     | 56±7                                    |
| <b>2</b>  | 7.1897                     | 25±4                                    |
| <b>1f</b> | 7.2400                     | 190±7                                   |
| <b>1c</b> | 7.2997                     | 65± 4                                   |
| <b>1i</b> | 7.8117                     | 133±22                                  |
| <b>1g</b> | 8.6352                     | 63± 3                                   |

<sup>a</sup> Docking Score values are given by the total\_score of Surflex-Dock method embedded in Tripos Sybyl 2.0.

<sup>b</sup> IC<sub>50</sub> values are given as the mean of three independent determinations.

<sup>c</sup> The IC<sub>50</sub> values of **1e** and **3** are treated as 200 and 500 nM for the correlation with Docking Score values.

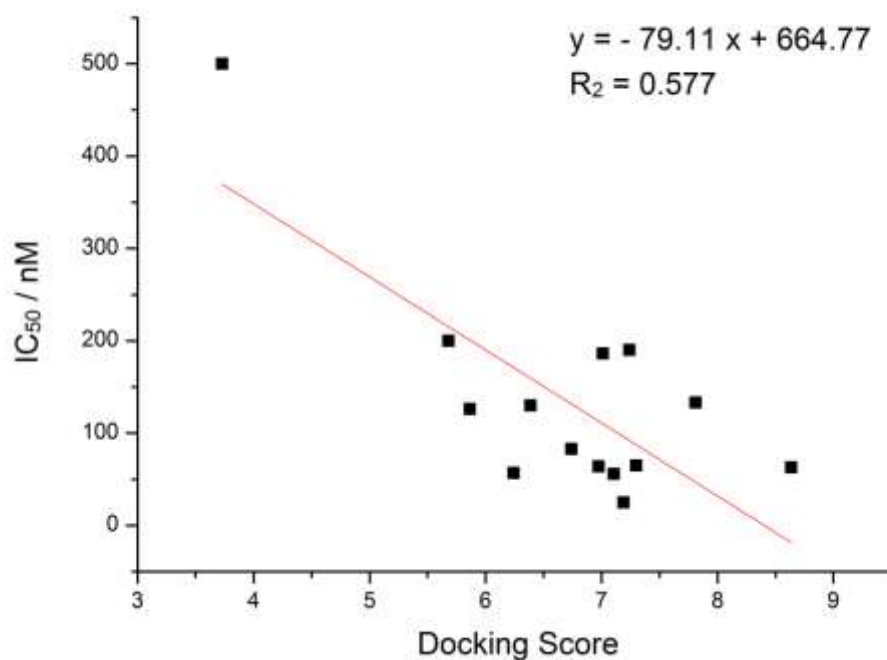

**Fig. S2.** The correlation between Docking Score values and IC<sub>50</sub> values of compound **1a-1l**, **2**, and **3**.

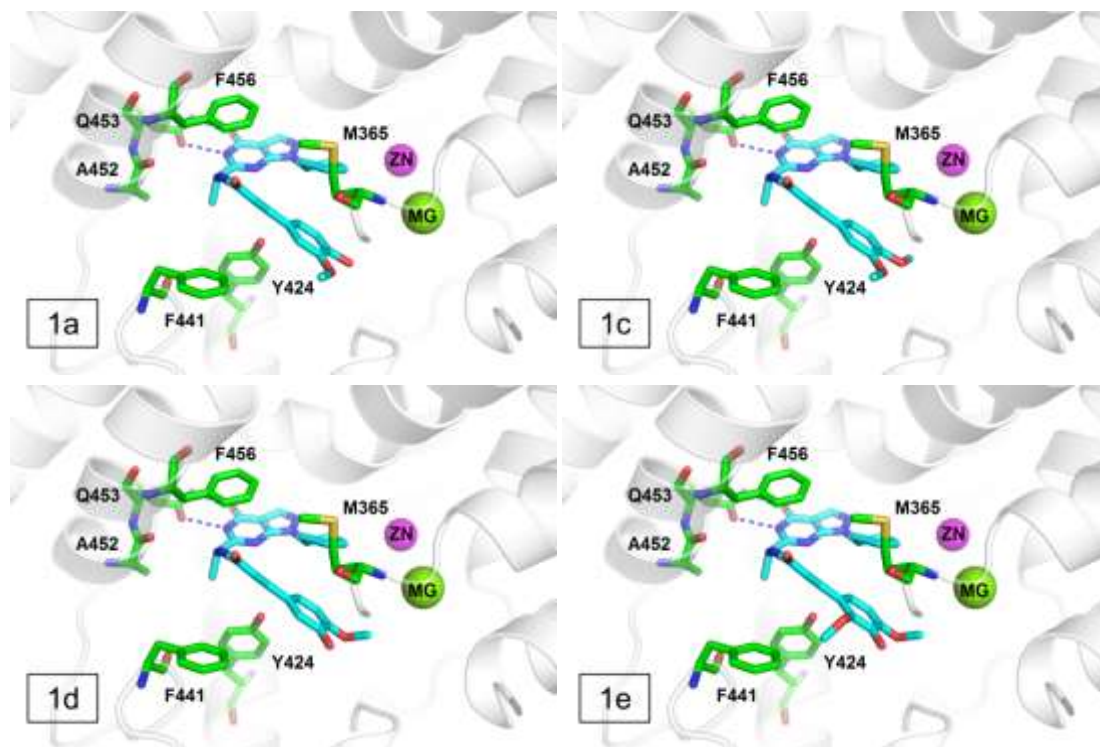

**Figure S3:** Binding modes of compound **1a**, **1c**, **1d** and **1e**.

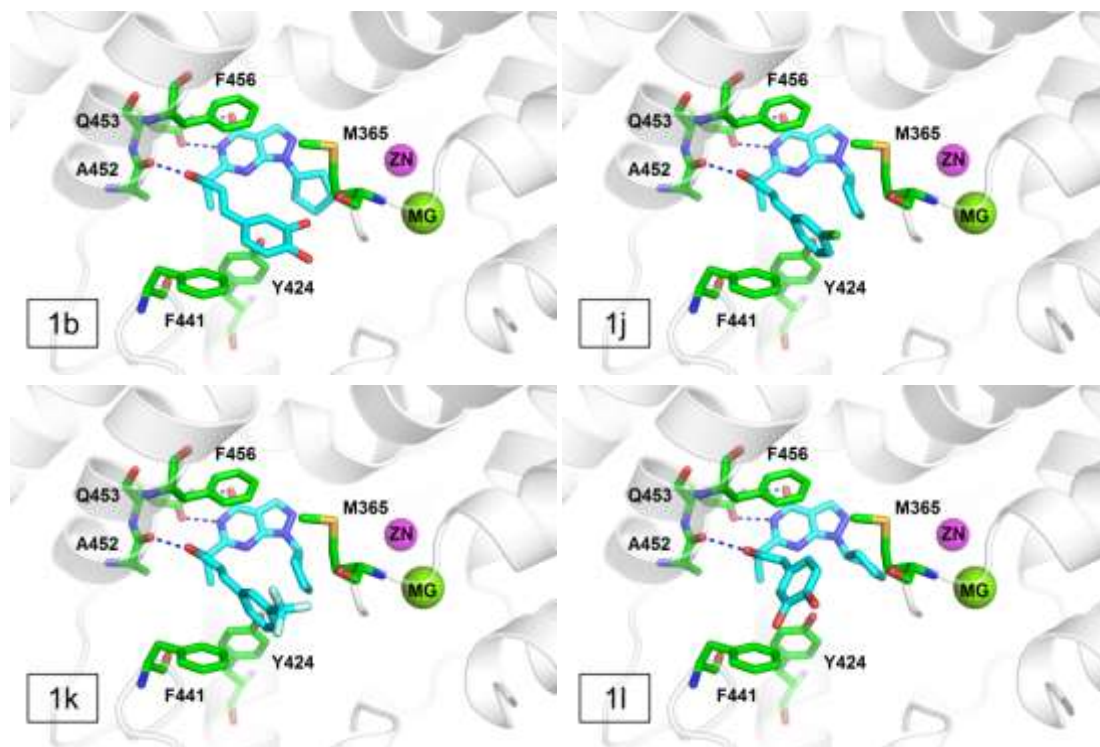

**Figure S4:** Binding modes of compounds **1b**, **1j**, **1k** and **1l**.

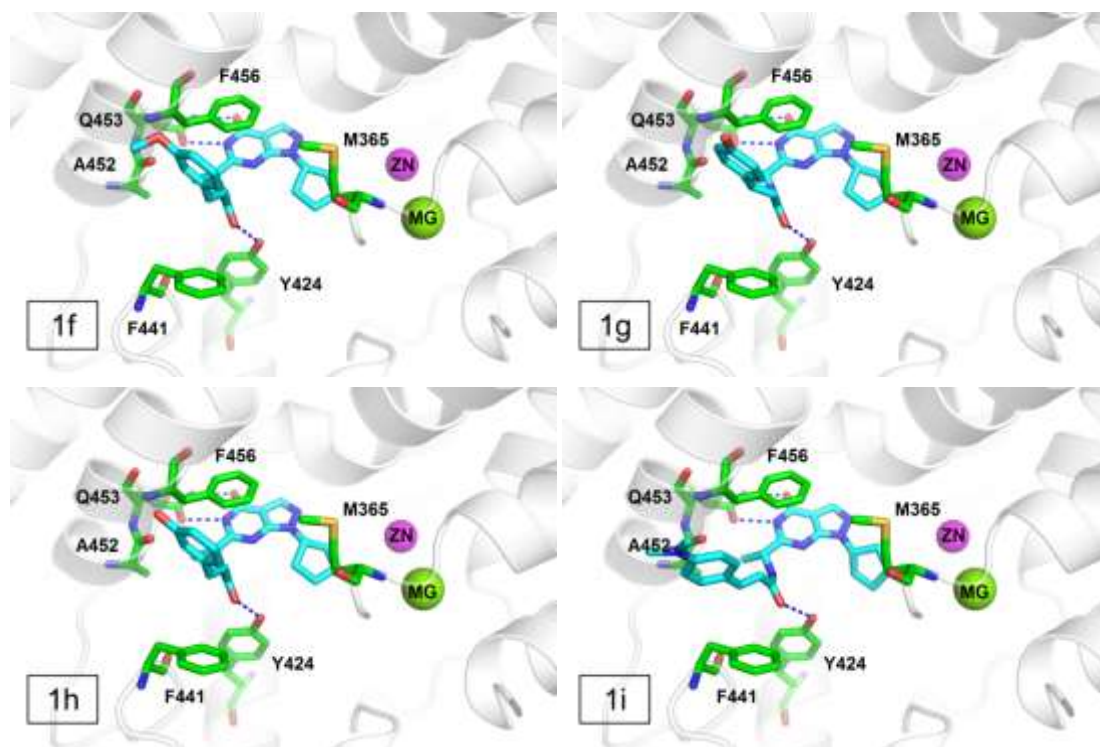

**Figure S5:** Binding modes of compounds **1f**, **1g**, **1h** and **1i**.

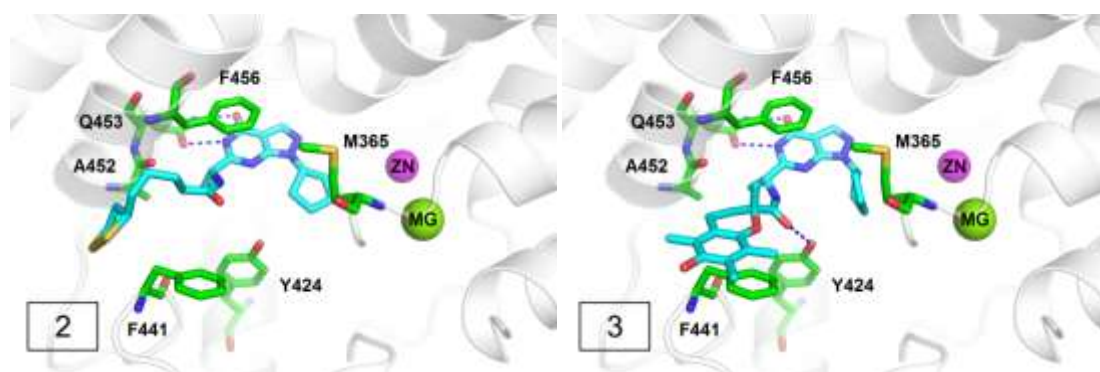

**Figure S6:** Binding modes of compounds **2** and **3**.

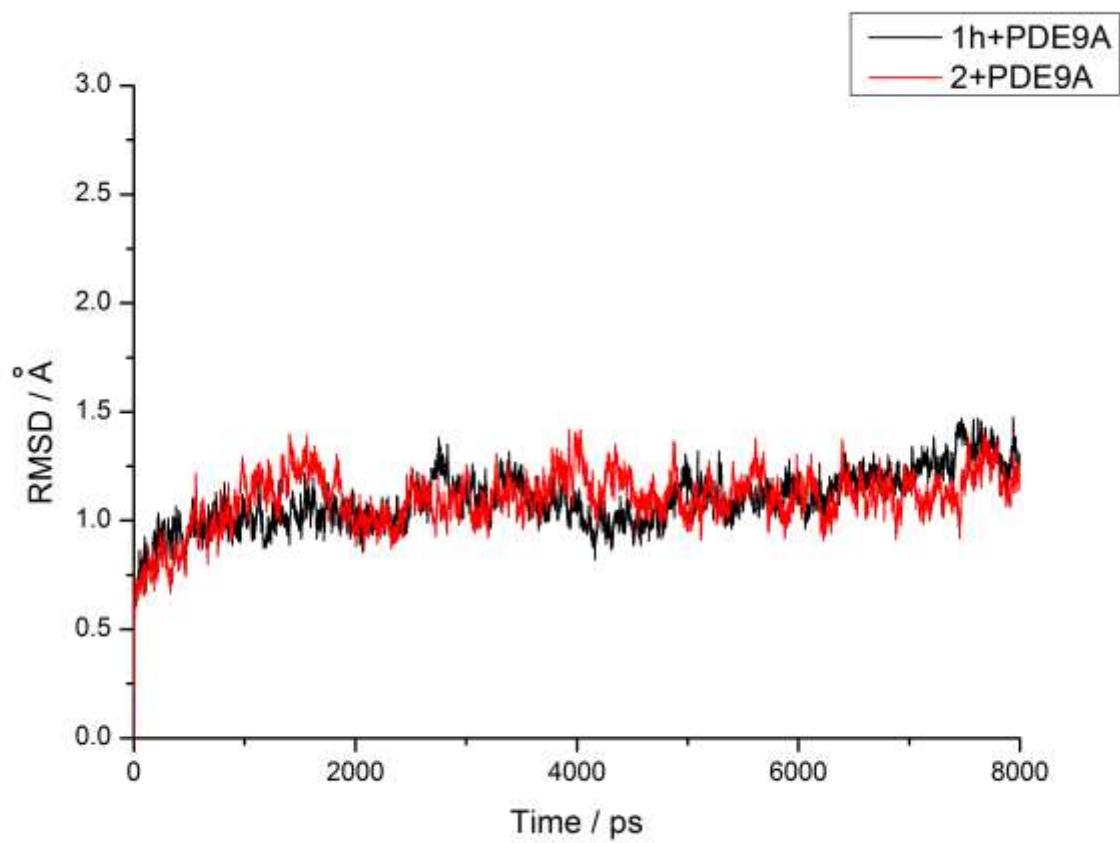

**Figure S7:** The RMSD plots of compounds **1h** and **2**.

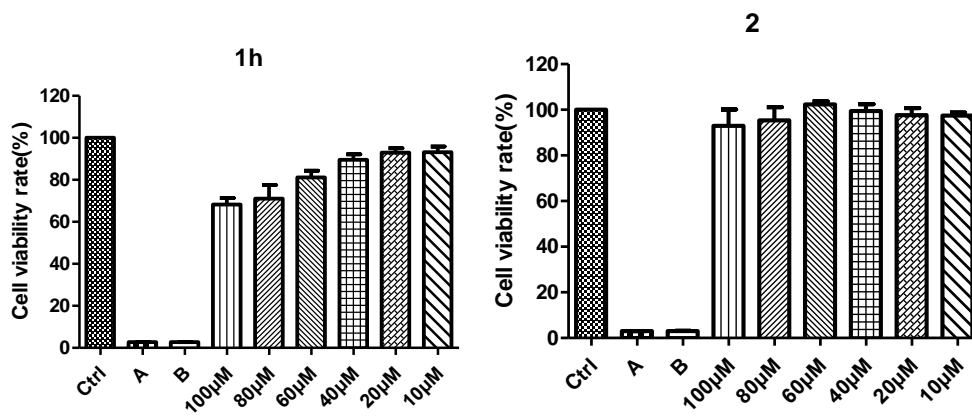

**Figure S8:** Cell viability of compounds **1h** and **2**. A) without cell and compounds A) without cell but compounds were added at 100μM



$^1\text{H}$  and  $^{13}\text{C}$  NMR of M-6

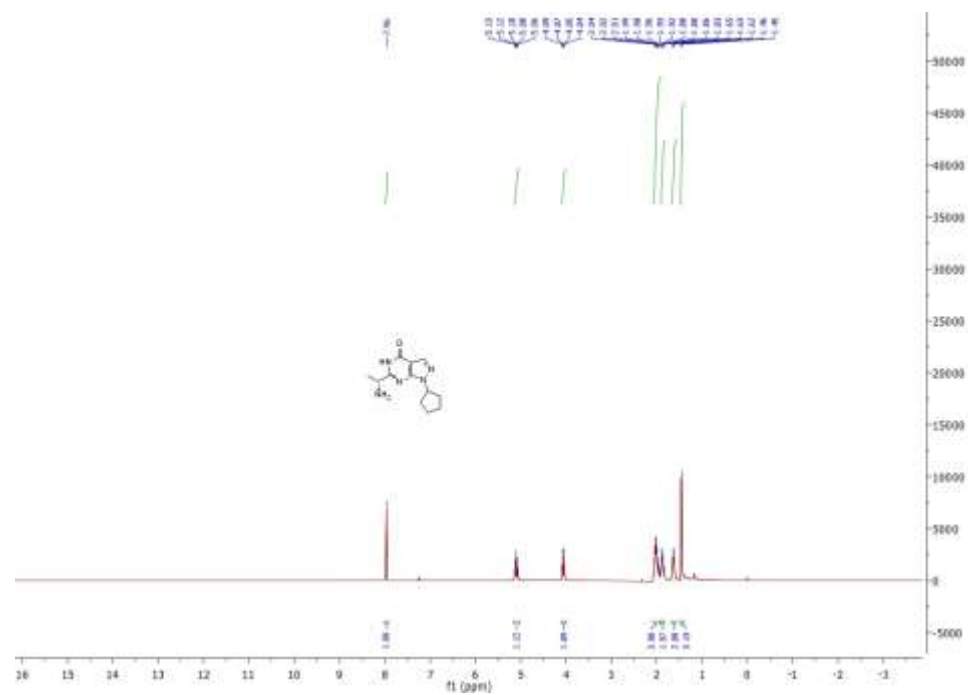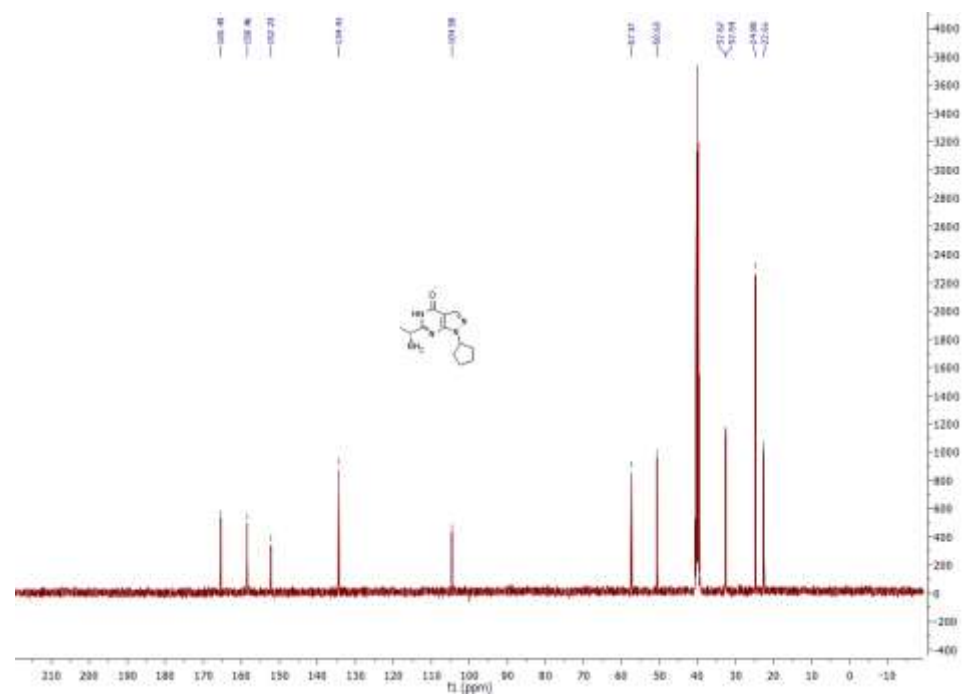

<sup>1</sup>H and <sup>13</sup>C NMR of **1a**

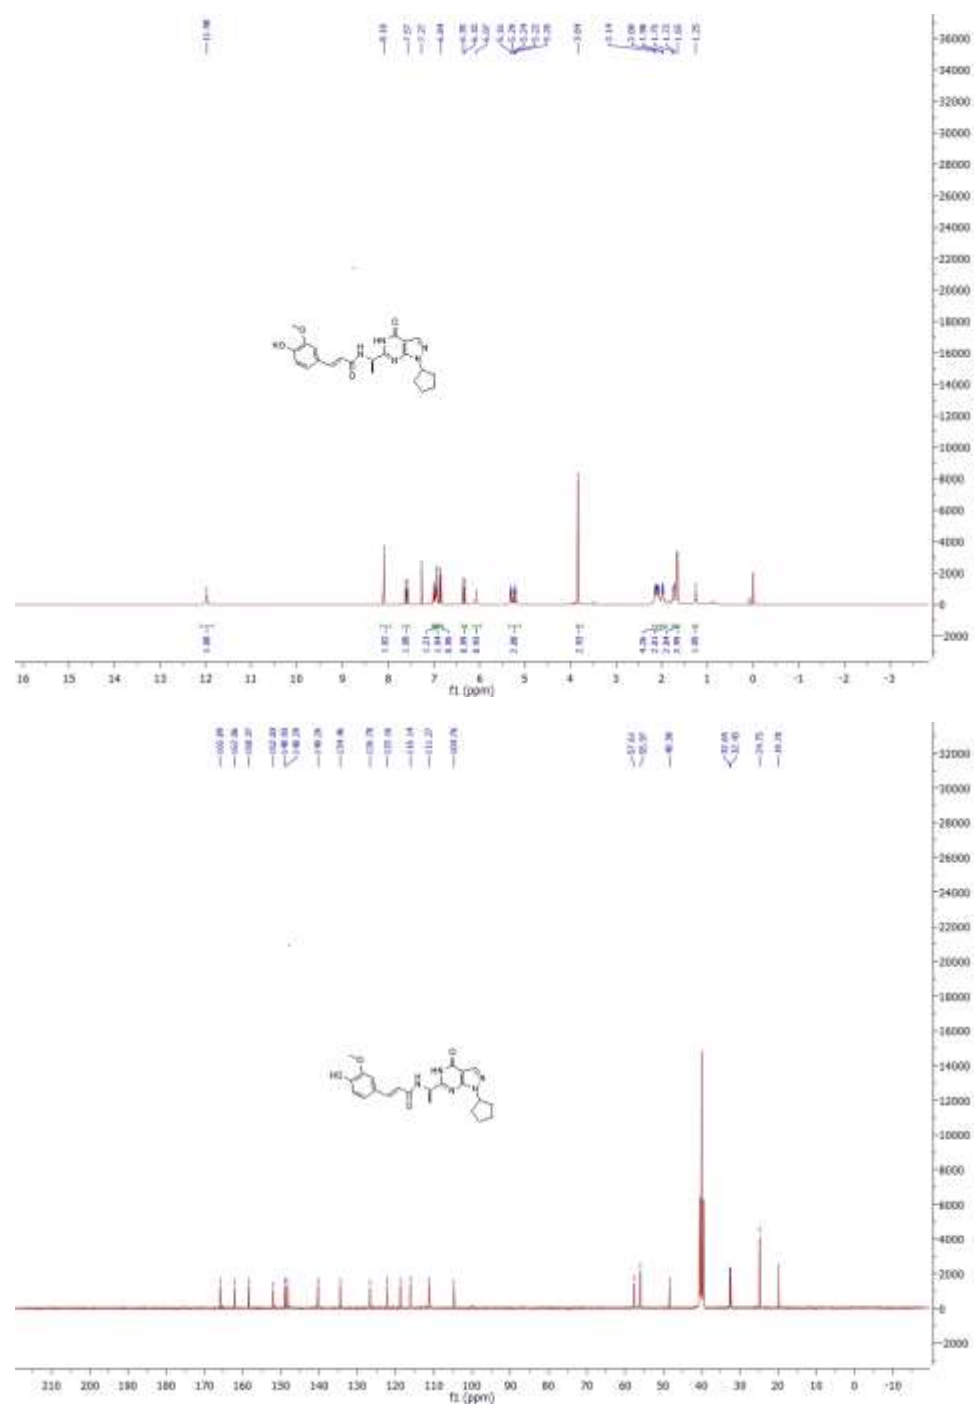

$^1\text{H}$  and  $^{13}\text{C}$  NMR of **1b**

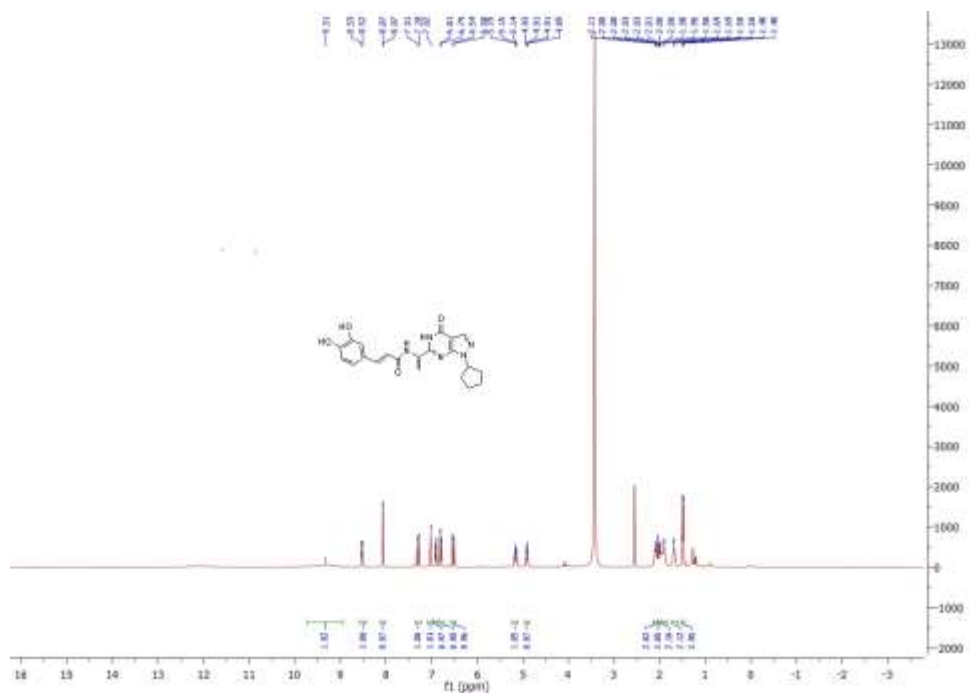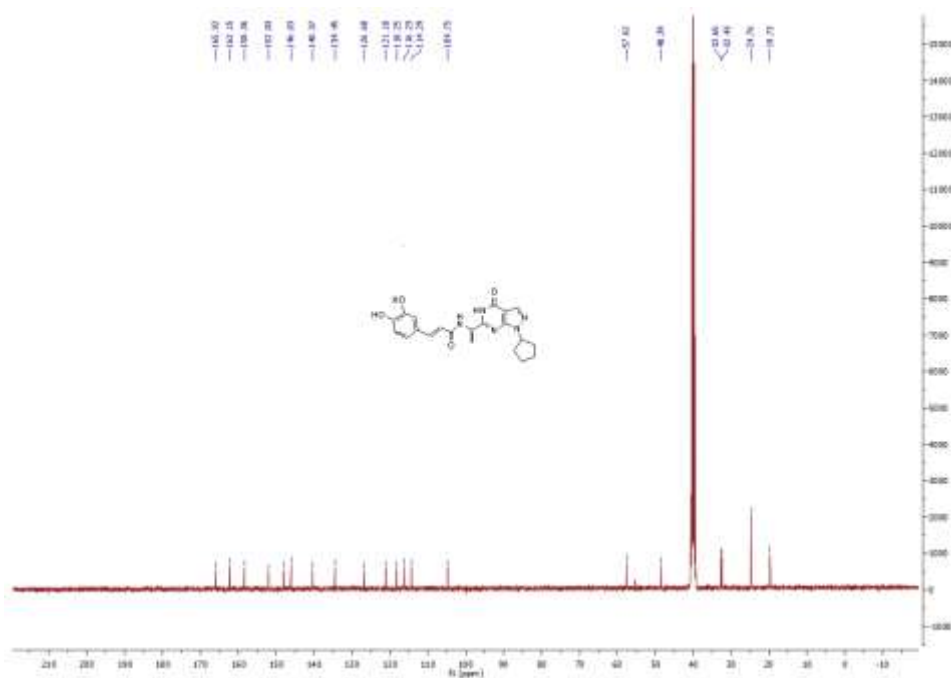

$^1\text{H}$  and  $^{13}\text{C}$  NMR of **1c**

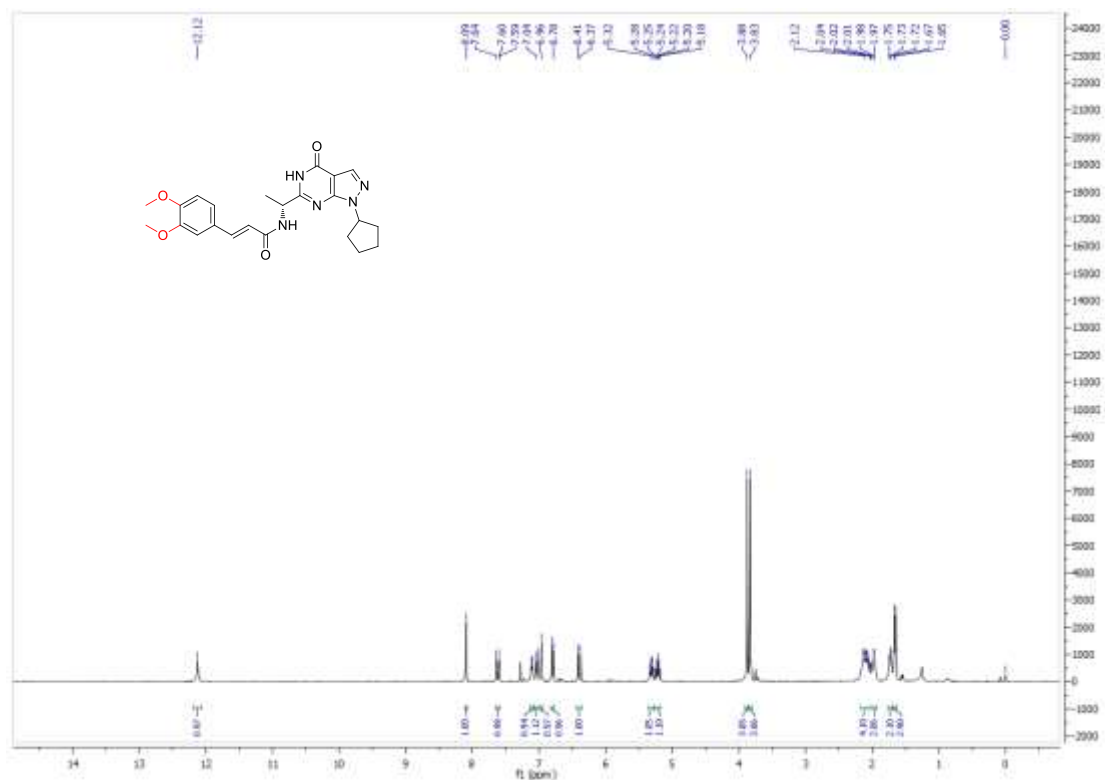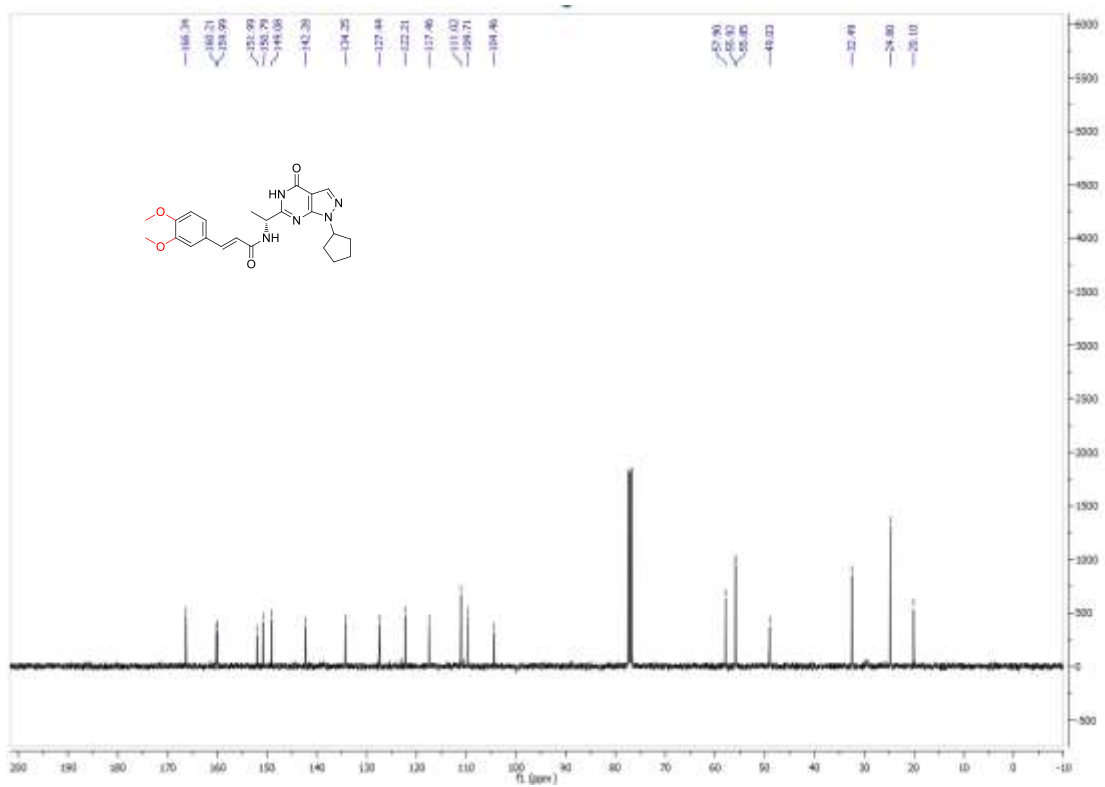

$^1\text{H}$  and  $^{13}\text{C}$  NMR of **1d**

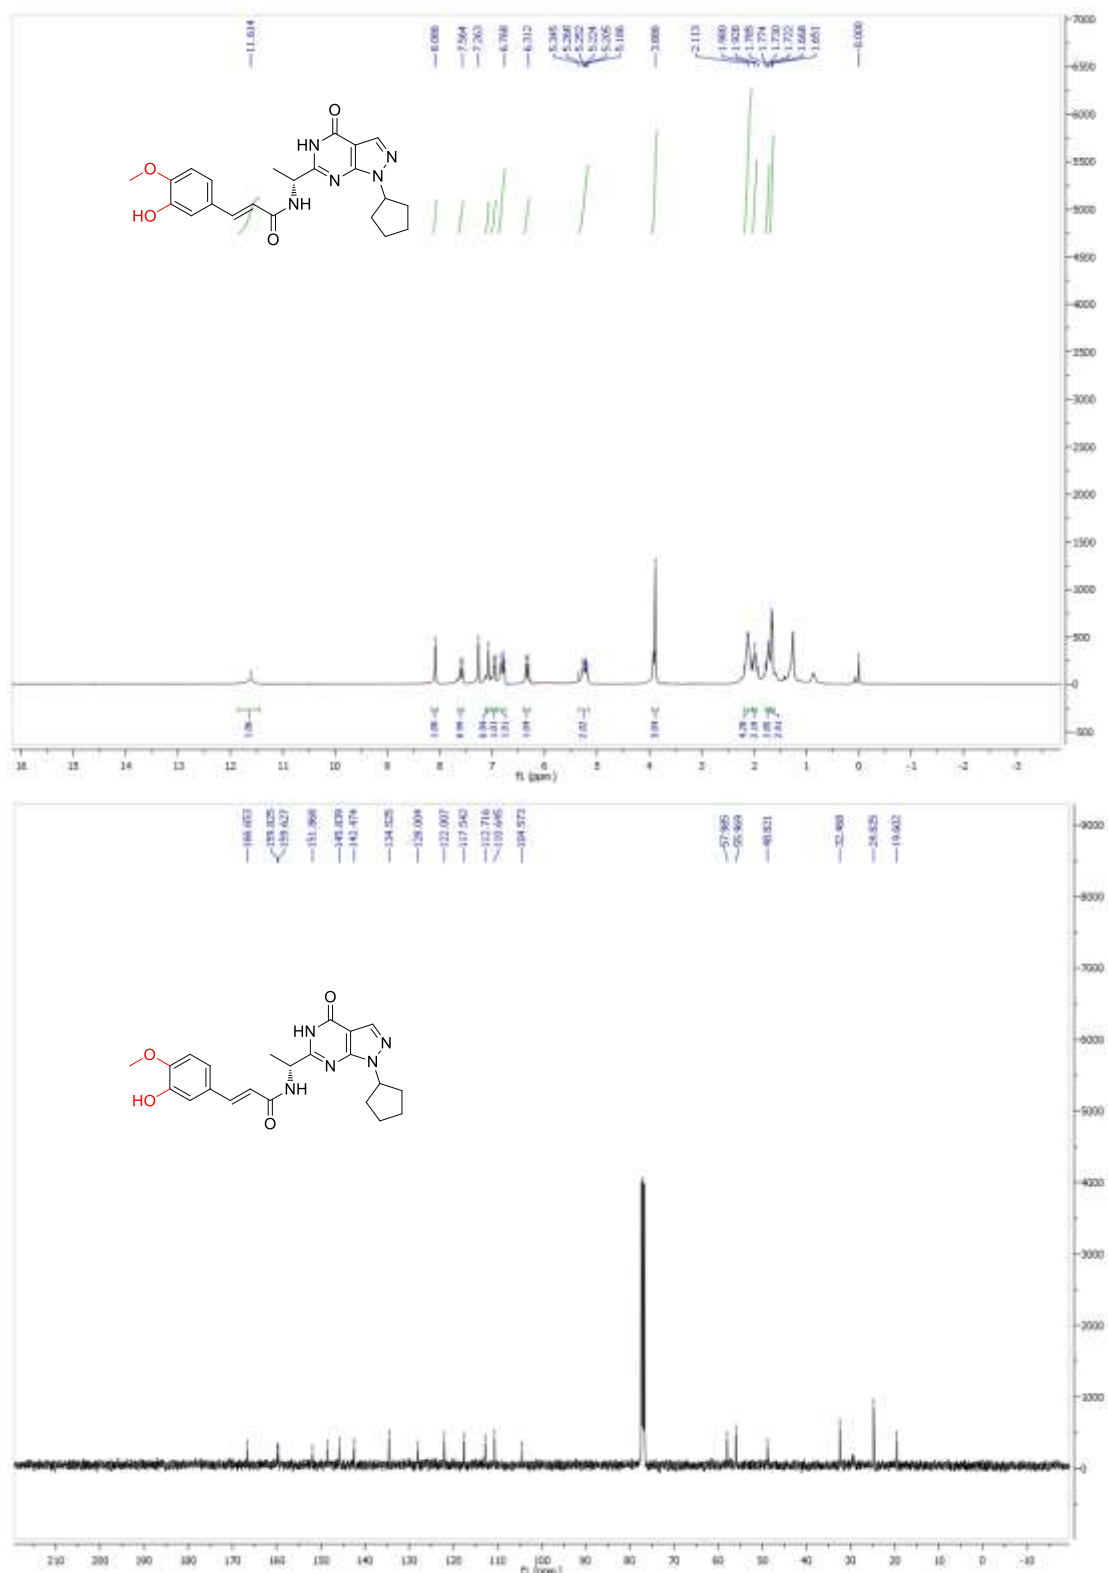



<sup>1</sup>H and <sup>13</sup>C NMR of **1f**

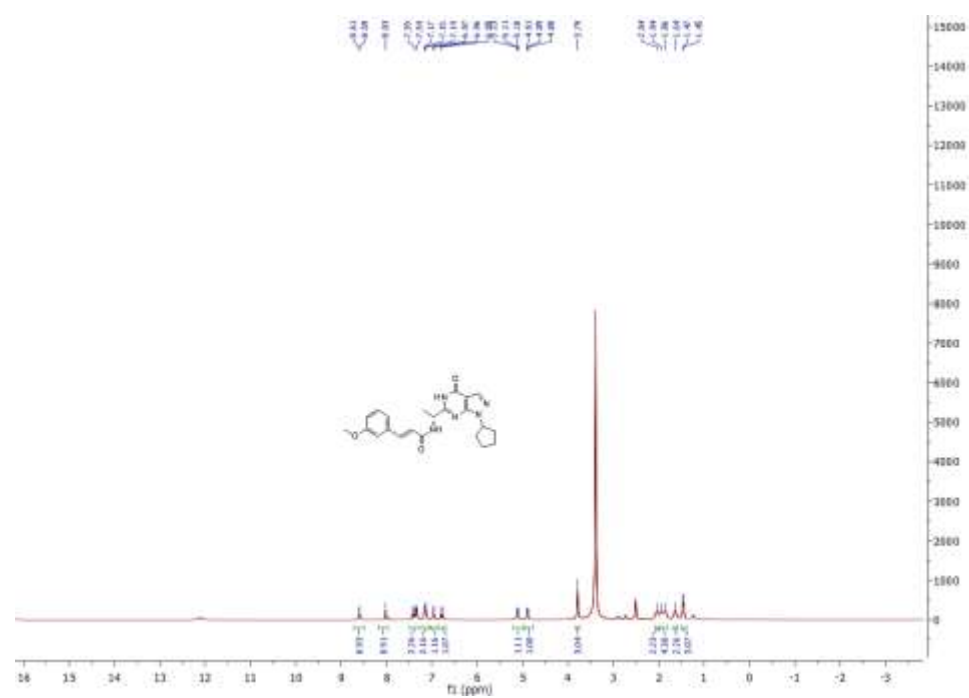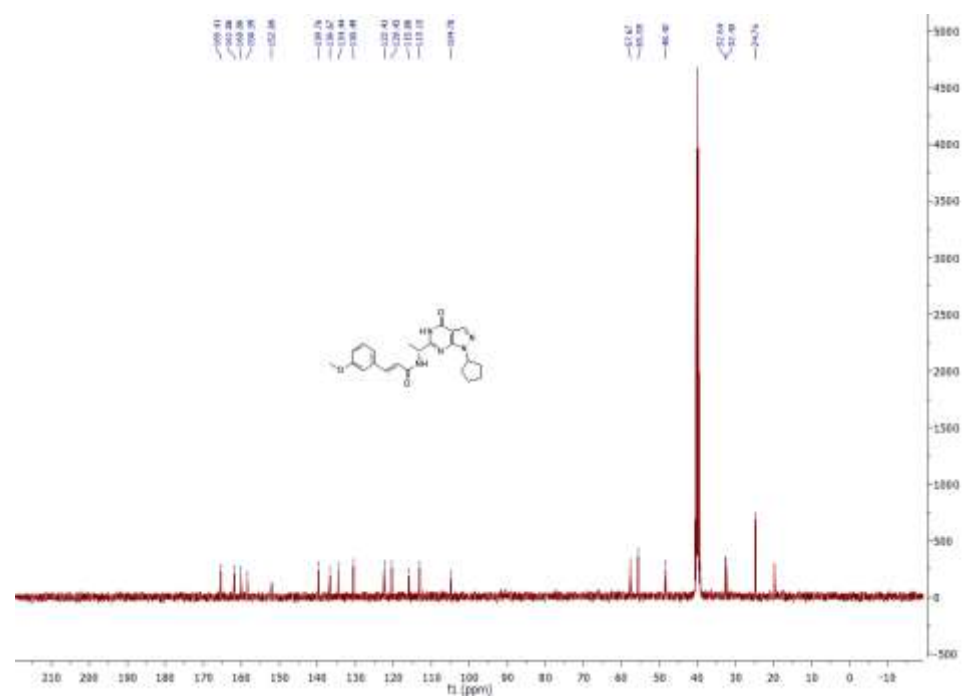

$^1\text{H}$  and  $^{13}\text{C}$  NMR of **1g**

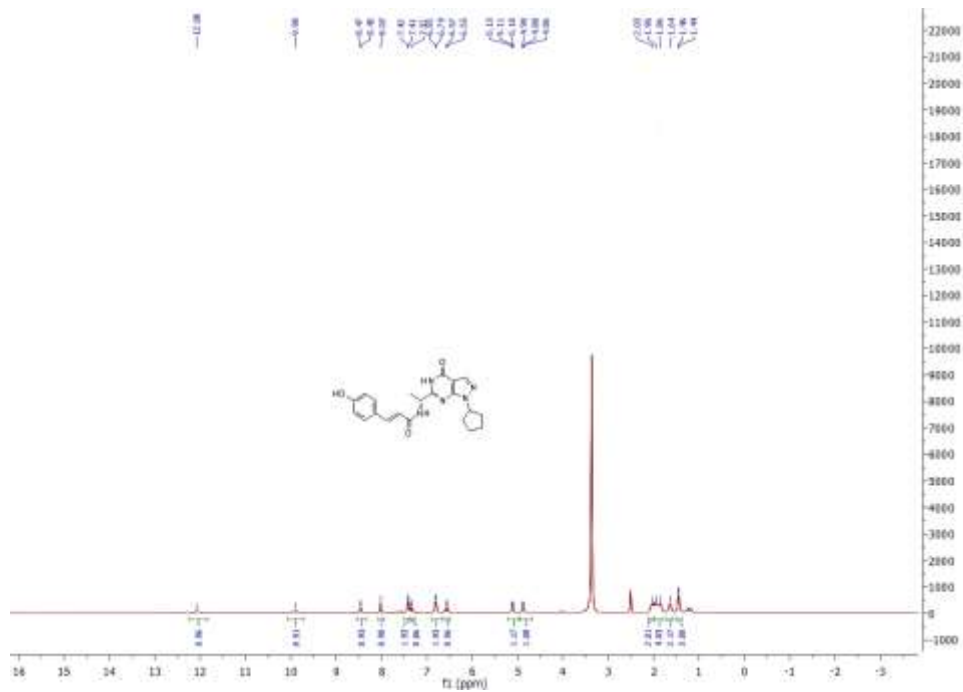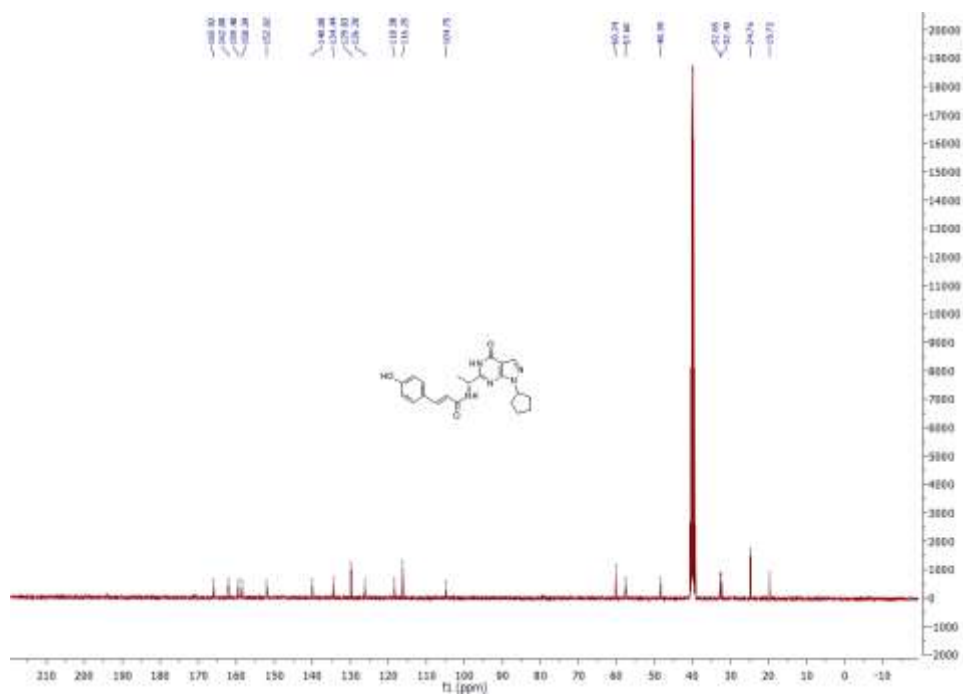



$^1\text{H}$  and  $^{13}\text{C}$  NMR of **1h**

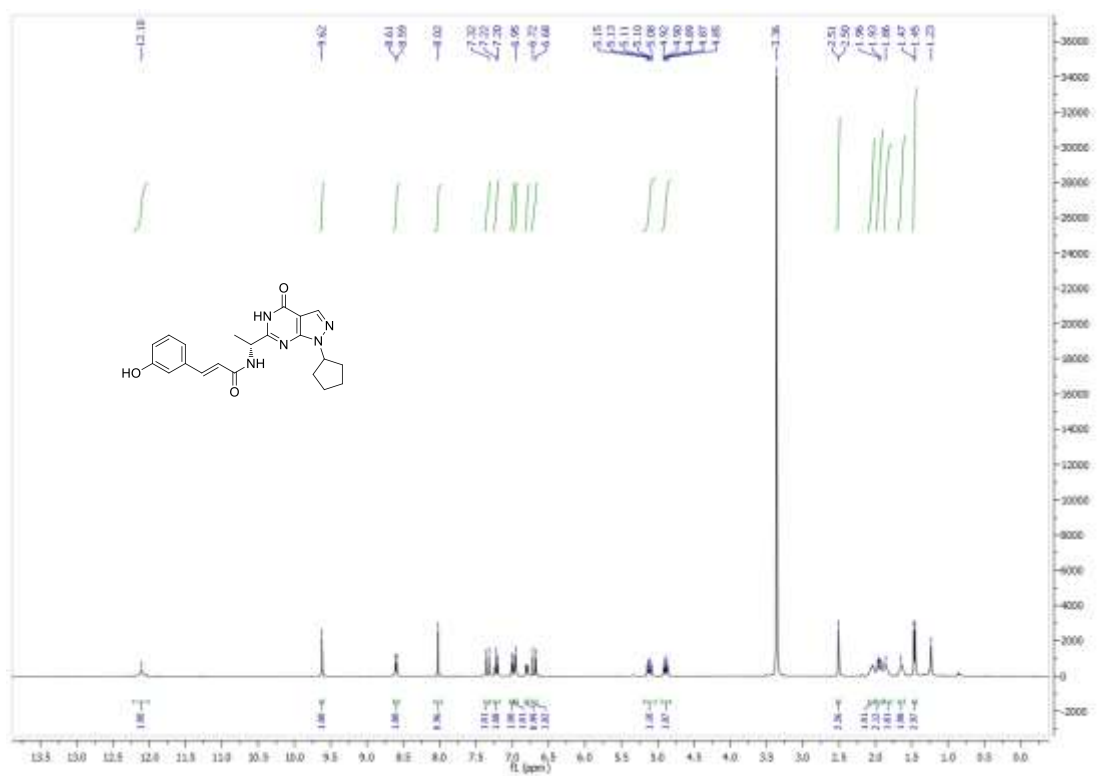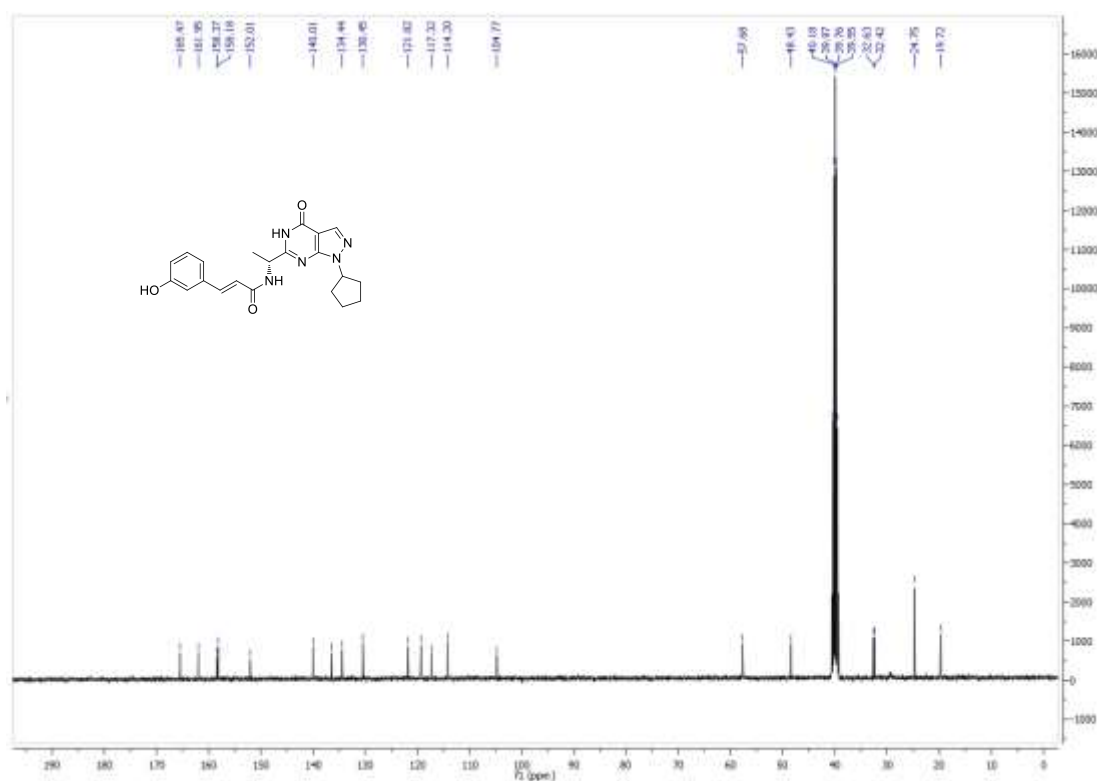

$^1\text{H}$  and  $^{13}\text{C}$  NMR of **1i**

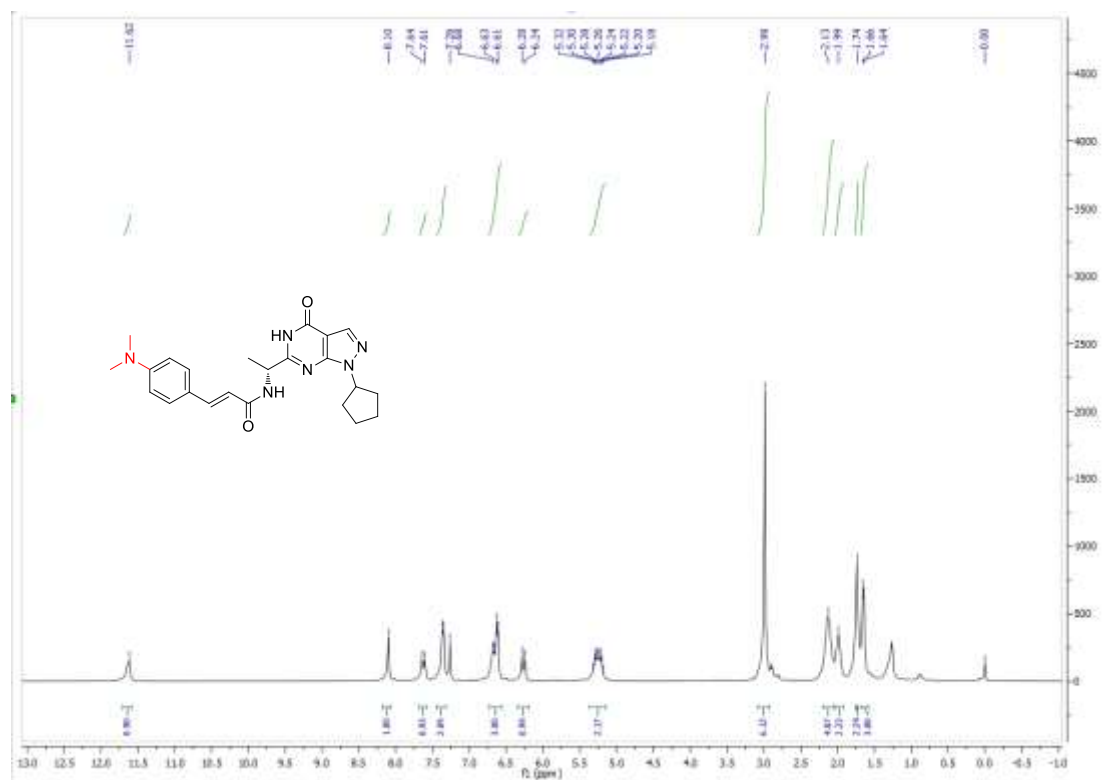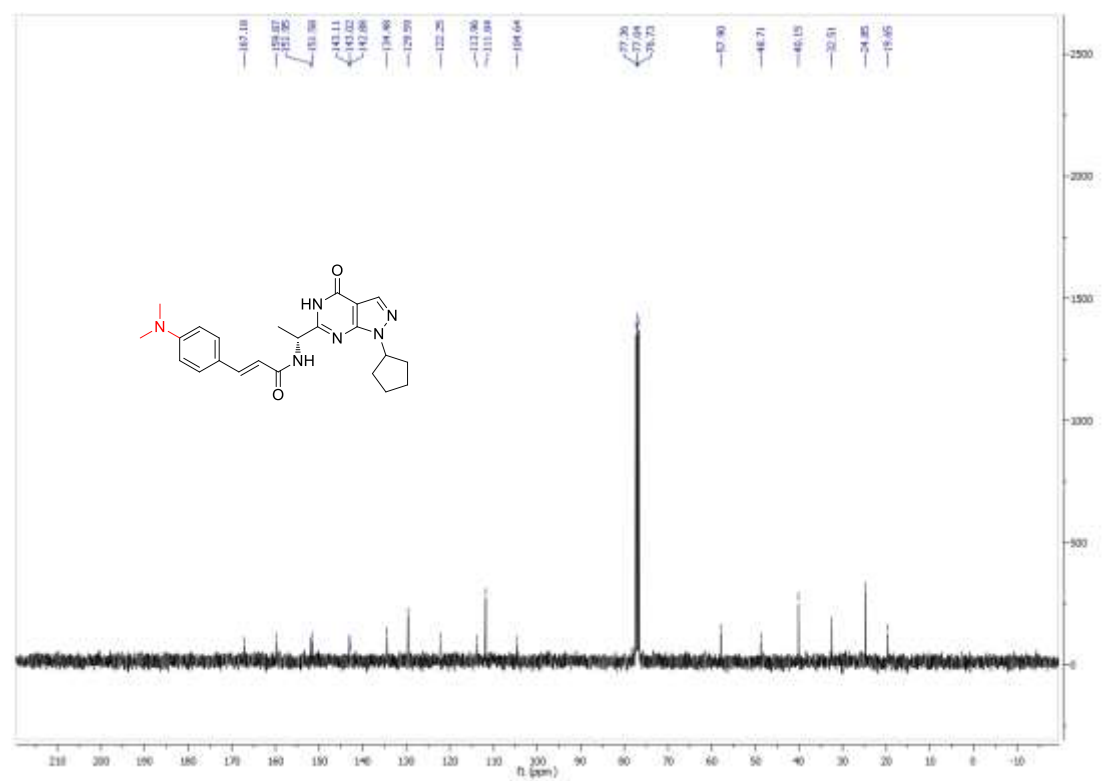

$^1\text{H}$  and  $^{13}\text{C}$  NMR of **1j**

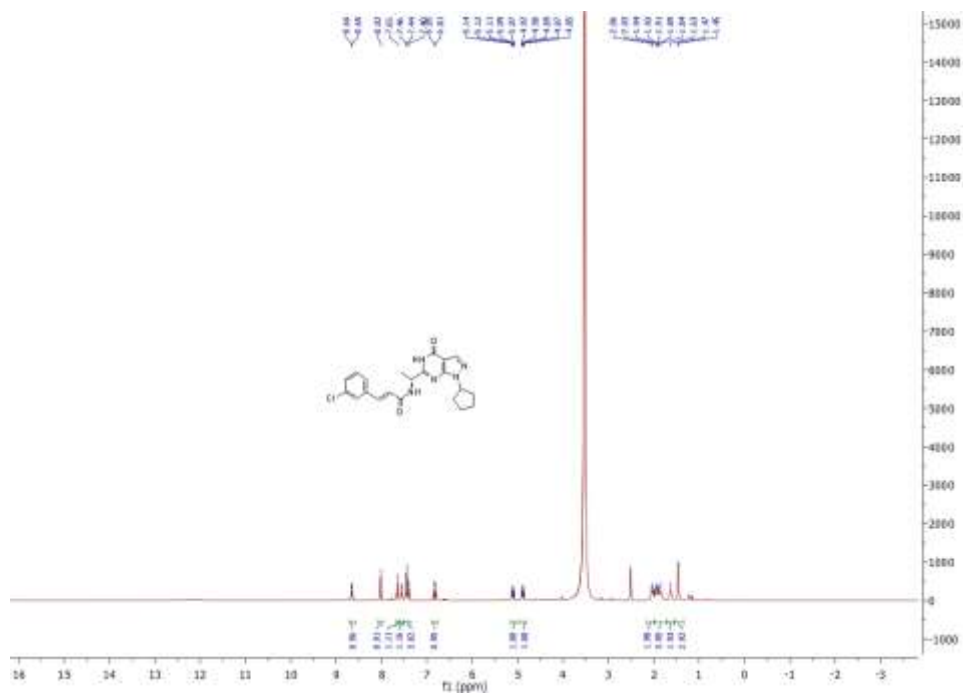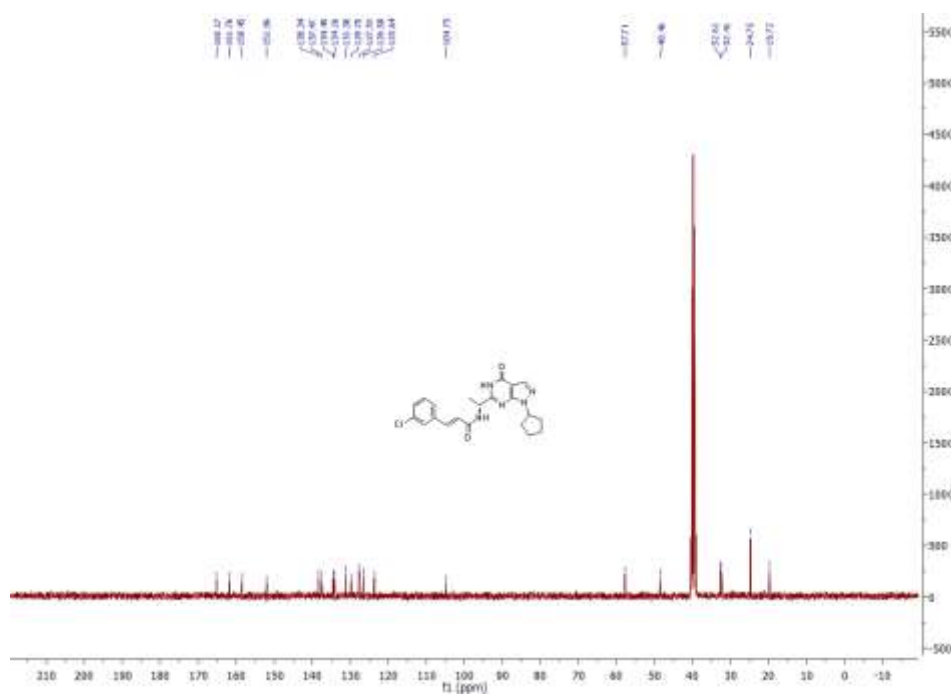

$^1\text{H}$  and  $^{13}\text{C}$  NMR of **1k**

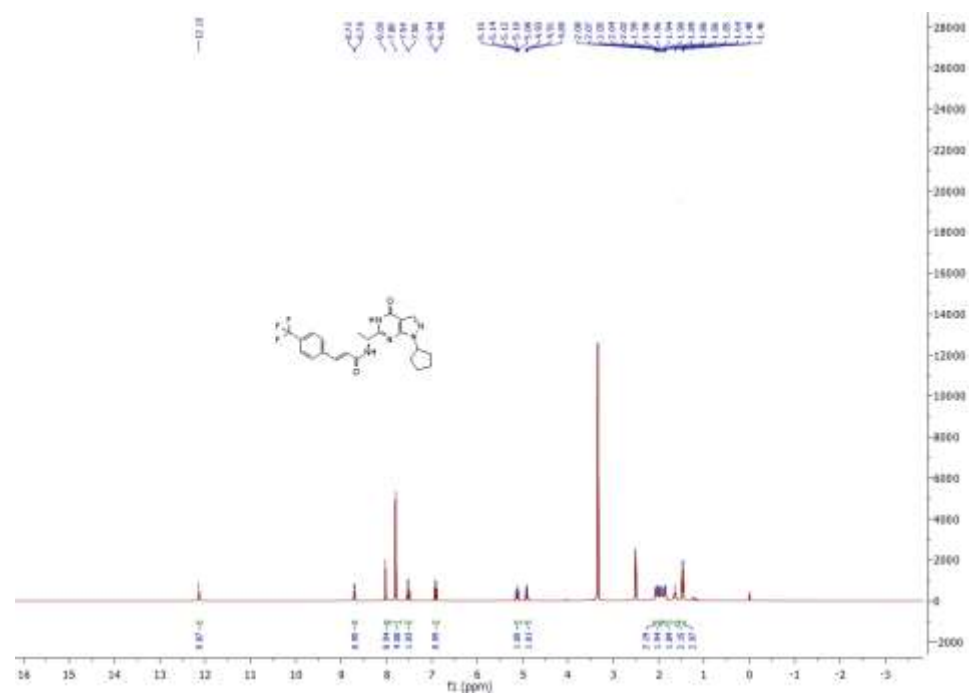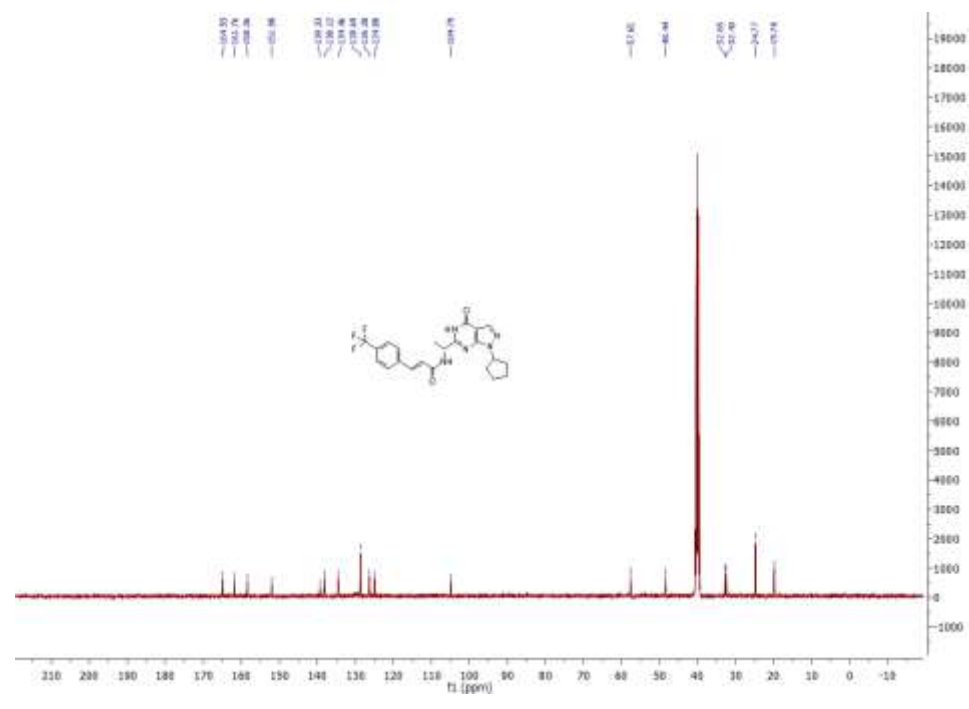

$^1\text{H}$  and  $^{13}\text{C}$  NMR of **11**

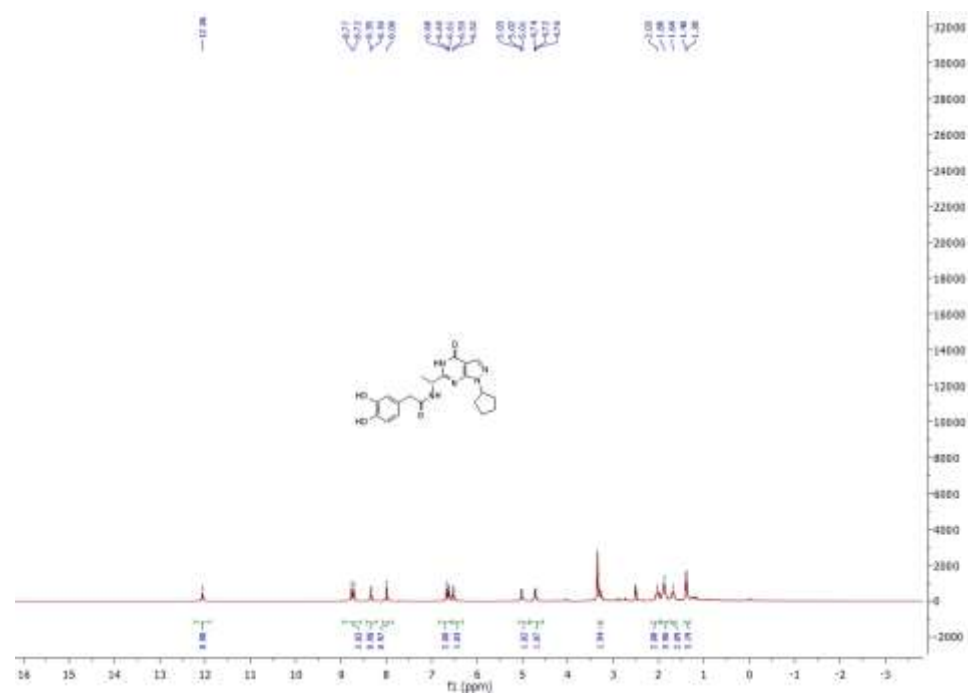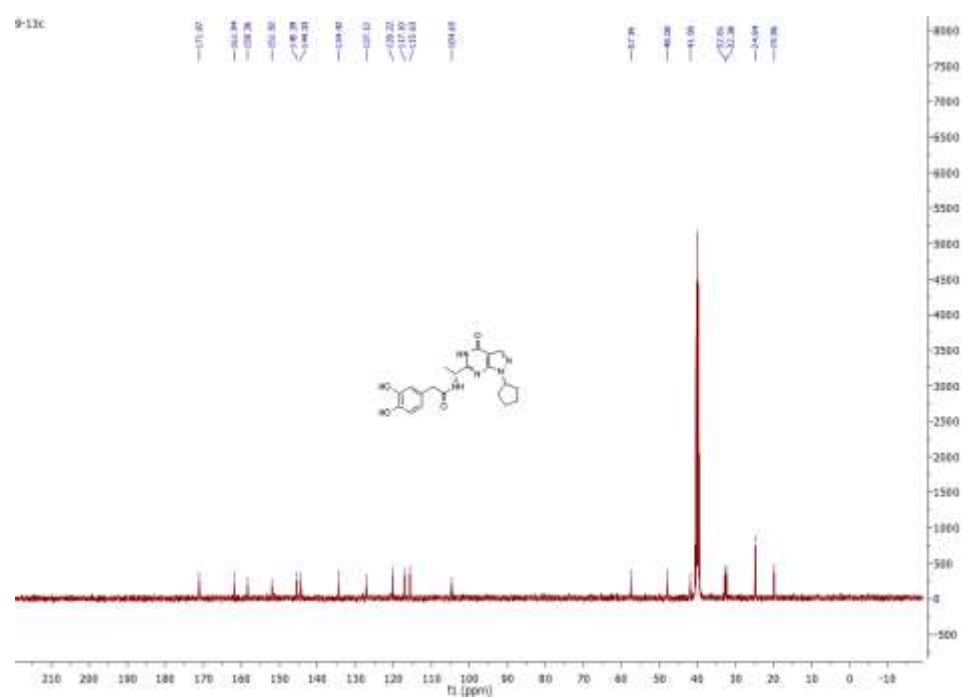

$^1\text{H}$  and  $^{13}\text{C}$  NMR of 2

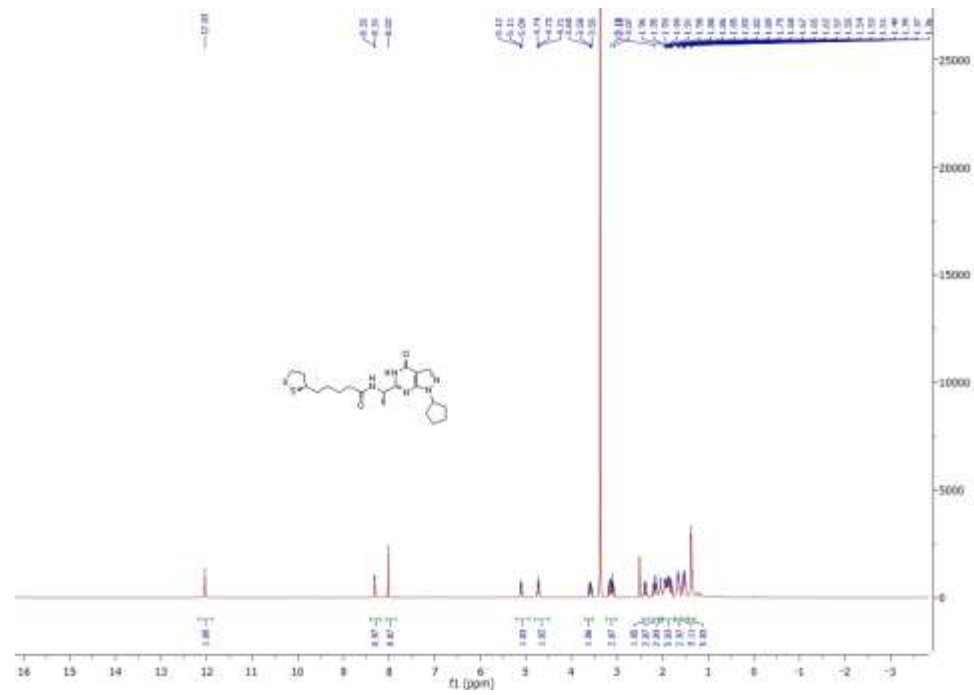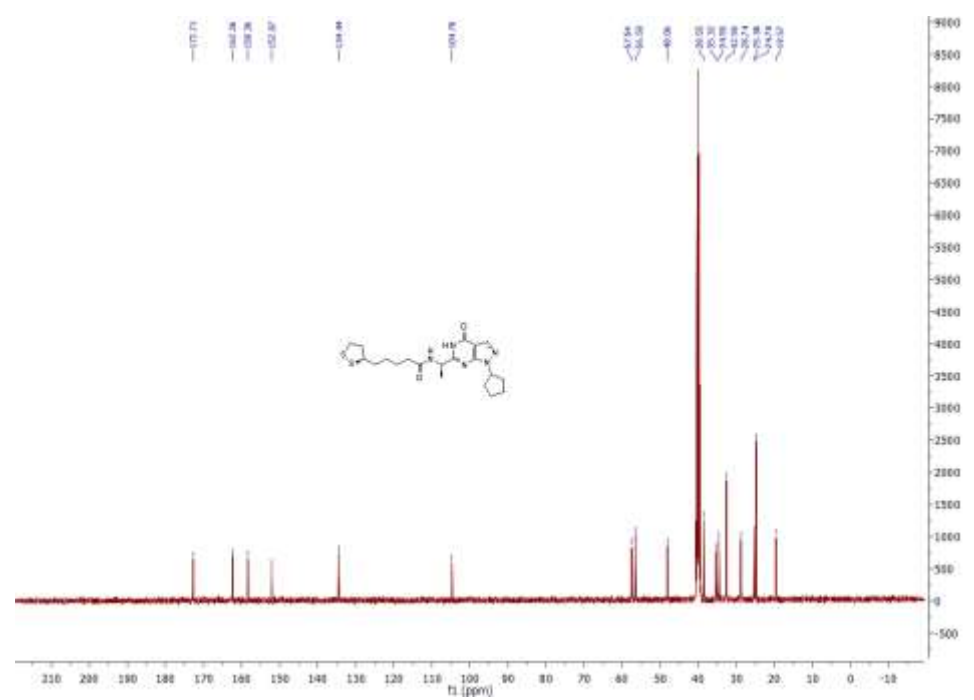

$^1\text{H}$  and  $^{13}\text{C}$  NMR of **3**

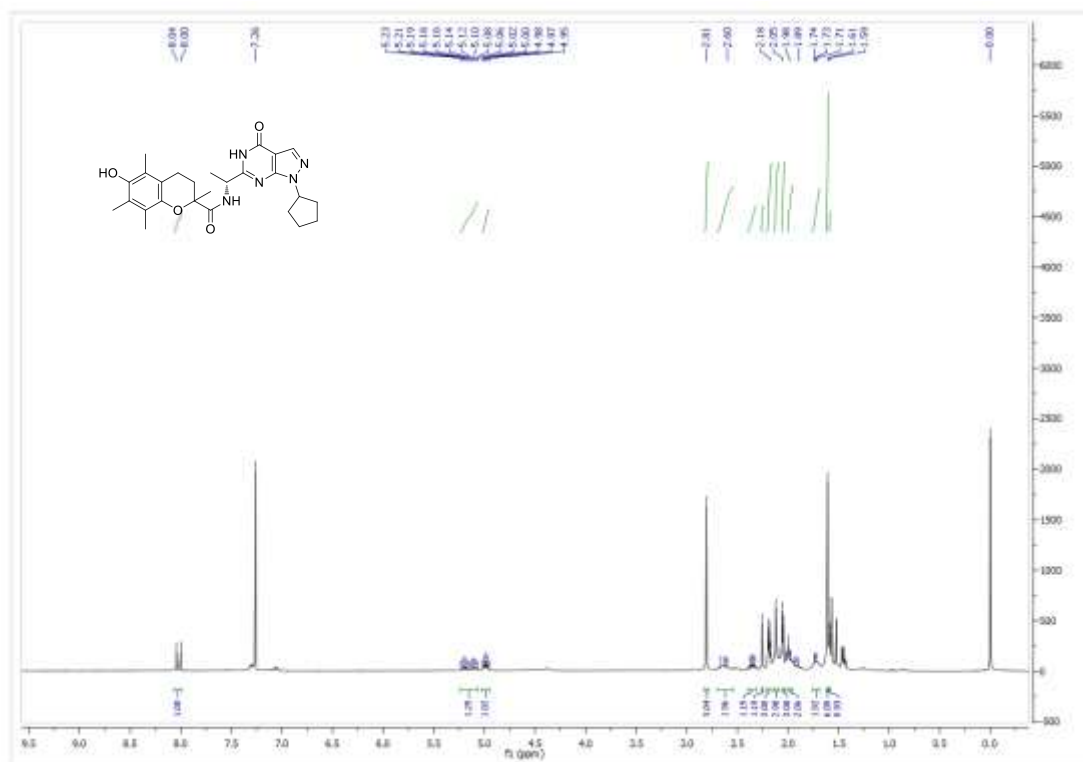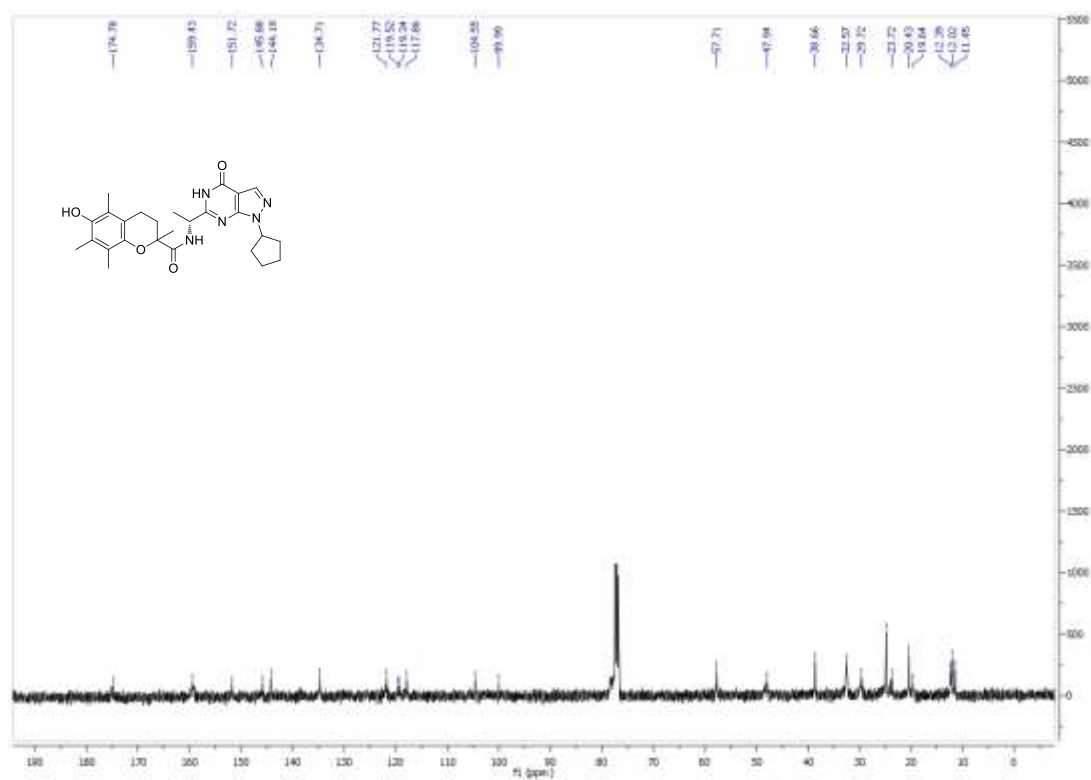

Supplement: IENZ_A_1412315_SM2243.pdf [file IENZ_A_1412315_SM2243.pdf]
